# Supplementary material for: Hydrazinonicotinic acid derivatization for selective ionization and improved glycan structure characterization by MALDI-MS
Source: Royal Society of Chemistry journal article supplement (doi:10.1039/c5an00572h), 2015-01-01
Supplement: c5an00572h1.pdf [file c5an00572h1.pdf]

# Supporting information

Jing Jiao,<sup>a,b</sup> Lijun Yang<sup>b</sup>, Ying Zhang<sup>\*a,b</sup> and Haojie Lu<sup>\*ab</sup>

<sup>a</sup> Shanghai Cancer Center and Key Laboratory of Glycoconjugates Research Ministry of Public Health, Fudan University, Shanghai 200032, P. R. China. E-mail [luhaojie@fudan.edu.cn](mailto:luhaojie@fudan.edu.cn). [ying@fudan.edu.cn](mailto:ying@fudan.edu.cn).  
Fax: (+86)21-5423-7961

<sup>b</sup> Department of Chemistry and Institutes of Biomedical Sciences, Fudan University, Shanghai, 200032, P. R. China.

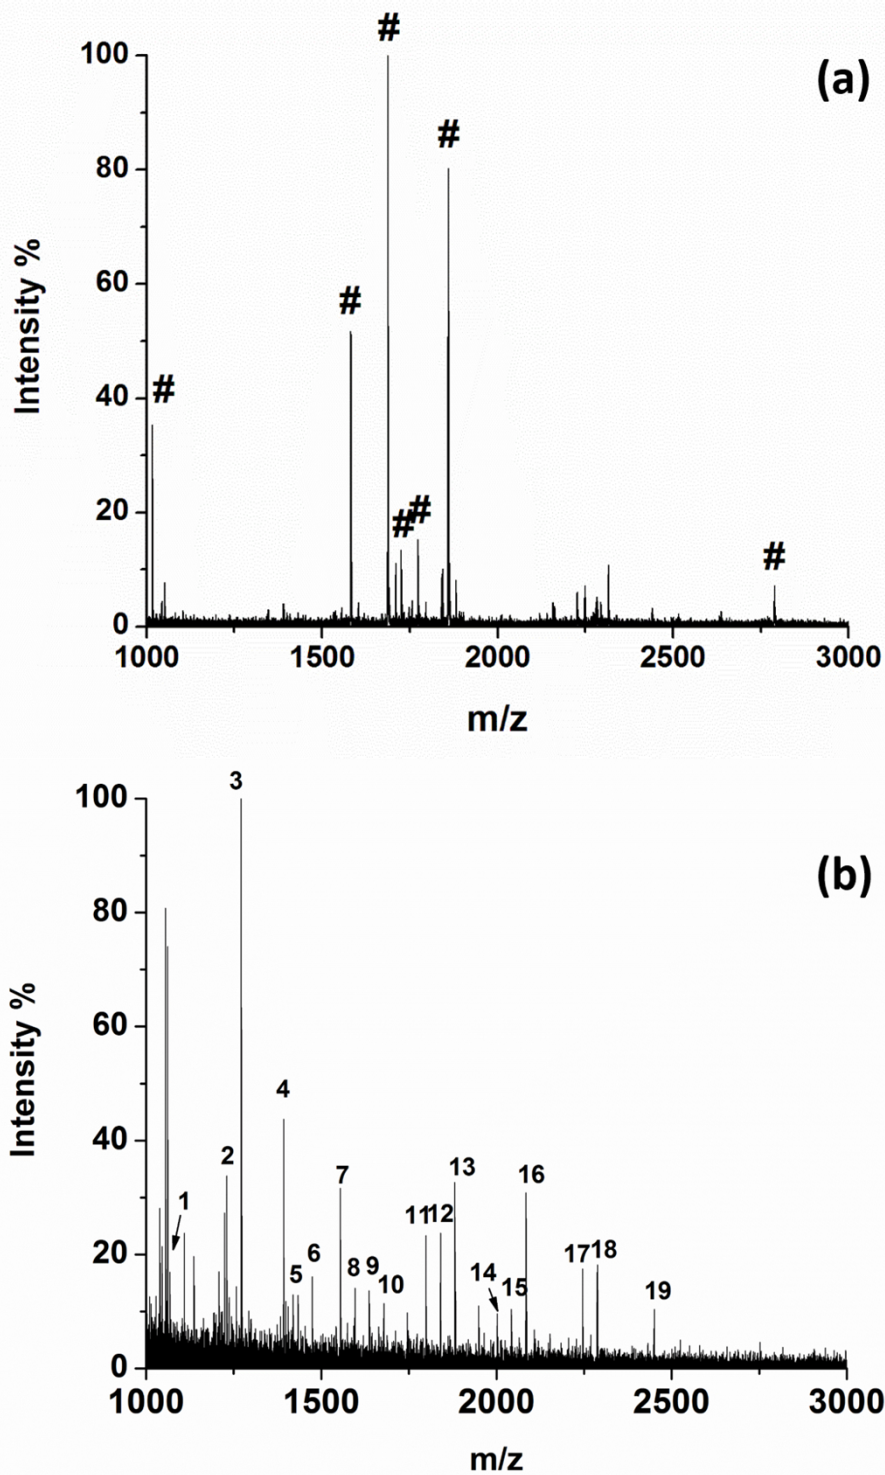

**Figure S1.** MALDI-TOF mass spectra of the mixture of tryptic deglycosylated peptides and N-linked glycans of ovalbumin (a) direct analysis with DHB matrix and (b) after HYNIC-derivatization and using the excess HYNIC as the matrix. Peaks labeled with # are ovalbumin peptides and peaks labeled with arabic numerals are N-linked glycans of ovalbumin.

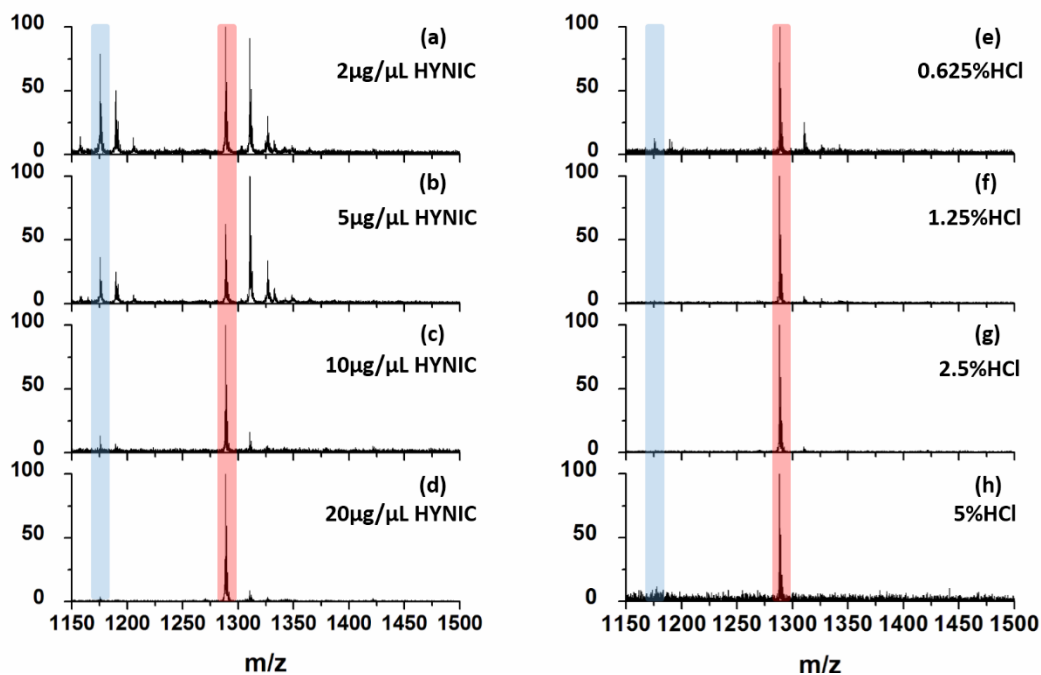

**Figure S2.** Optimization of reaction conditions for the derivatization of oligosaccharides including the concentration of HYNIC (left panel) and the volume fraction of HCl (right panel).

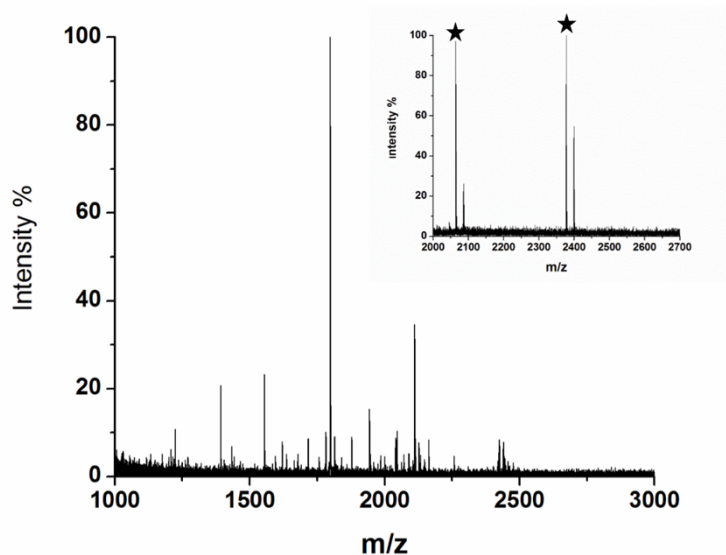

**Figure S3.** MALDI-TOF-MS spectrum of HYNIC derivatized N-glycans of human serum. The insert MS spectrum shows the signals detected under negative mode. ★ denotes  $[M-H]^-$  signals of derivatized N-glycans.

**Table S1.** HYNIC-derivatized N-linked glycans released from RNase B.

| Peak No. | Theoretical m/z of native glycans | Theoretical m/z of HYNIC-derivatized glycans | Observed m/z of HYNIC-derivatized glycans | Composition                                                                         |
|----------|-----------------------------------|----------------------------------------------|-------------------------------------------|-------------------------------------------------------------------------------------|
| 1        | 1257.4                            | 1392.4                                       | 1392.4                                    |  |
| 2        | 1419.5                            | 1554.5                                       | 1554.5                                    |  |
| 3        | 1581.5                            | 1716.5                                       | 1716.5                                    |  |
| 4        | 1743.6                            | 1878.6                                       | 1878.5                                    |  |
| 5        | 1905.6                            | 2040.6                                       | 2040.6                                    |  |

**Table S2.** HYNIC-derivatized N-linked glycans released from ovalbumin.

| Peak No. | Theoretical m/z of native glycans | Theoretical m/z of HYNIC-derivatized glycans | Observed m/z of HYNIC-derivatized glycans | Composition                                                                           |
|----------|-----------------------------------|----------------------------------------------|-------------------------------------------|---------------------------------------------------------------------------------------|
| 1        | 933.3                             | 1068.3                                       | 1068.3                                    | 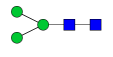   |
| 2        | 1095.4                            | 1230.4                                       | 1230.3                                    |    |
| 3        | 1136.4                            | 1271.4                                       | 1271.4                                    |    |
| 4        | 1257.4                            | 1392.4                                       | 1392.4                                    |    |
| 5        | 1298.4                            | 1433.4                                       | 1433.4                                    |    |
| 6        | 1339.5                            | 1474.5                                       | 1474.5                                    |    |
| 7        | 1419.5                            | 1554.5                                       | 1554.5                                    |    |
| 8        | 1460.5                            | 1595.5                                       | 1595.5                                    |    |
| 9        | 1501.5                            | 1636.5                                       | 1636.5                                    |  |
| 10       | 1542.6                            | 1677.6                                       | 1677.5                                    |  |
| 11       | 1663.6                            | 1798.6                                       | 1798.6                                    |  |
| 12       | 1704.6                            | 1839.6                                       | 1839.6                                    |  |
| 13       | 1745.6                            | 1880.6                                       | 1880.6                                    |  |
| 14       | 1866.7                            | 2001.7                                       | 2001.7                                    |  |
| 15       | 1907.7                            | 2042.7                                       | 2042.7                                    |  |
| 16       | 1948.7                            | 2083.7                                       | 2083.7                                    |  |
| 17       | 2110.8                            | 2245.8                                       | 2245.8                                    |  |
| 18       | 2151.8                            | 2286.8                                       | 2286.8                                    |  |
| 19       | 2313.8                            | 2448.8                                       | 2448.8                                    |  |

**Table S3.** Observed m/z value in Figure 4b and corresponding fragmentation type of HYNIC-derivatized DP7 (BY ions are not included).

| Peak No. | Observed m/z value | Fragmentation type                |
|----------|--------------------|-----------------------------------|
| 1        | 260.2              | C <sup>2,5</sup> X <sub>Glc</sub> |
| 2        | 319.3              | Z1                                |
| 3        | 363.3              | C2                                |
| 4        | 419.4              | B <sup>1,4</sup> X <sub>Glc</sub> |
| 5        | 467.4              | C <sup>0,4</sup> X <sub>Glc</sub> |
| 6        | 525.5              | C3                                |
| 7        | 581.5              | B <sup>0,3</sup> X <sub>Glc</sub> |
| 8        | 629.5              | C <sup>0,4</sup> X <sub>Glc</sub> |
| 9        | 687.6              | C4                                |
| 10       | 743.7              | B <sup>0,3</sup> X <sub>Glc</sub> |
| 11       | 791.7              | C <sup>0,4</sup> X <sub>Glc</sub> |
| 12       | 849.7              | C5                                |
| 13       | 907.9              | C <sup>2,5</sup> X <sub>Glc</sub> |
| 14       | 953.9              | C <sup>0,4</sup> X <sub>Glc</sub> |
| 15       | 1012.0             | C6                                |
| 16       | 1111.6             | <sup>2,4</sup> X <sub>Glc</sub>   |

**Table S4.** HYNIC-derivatized N-linked glycans released from human serum.

| No. | Theoretical m/z of native glycans | Theoretical m/z of HYNIC-derivatized glycans | Observed m/z of HYNIC-derivatized glycans | Composition                                                                           |
|-----|-----------------------------------|----------------------------------------------|-------------------------------------------|---------------------------------------------------------------------------------------|
| 1   | 1079.4                            | 1214.4                                       | 1214.4                                    | 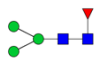   |
| 2   | 1095.4                            | 1230.4                                       | 1230.2                                    |    |
| 3   | 1136.4                            | 1271.4                                       | 1271.4                                    |    |
| 4   | 1257.4                            | 1392.4                                       | 1392.4                                    |    |
| 5   | 1282.5                            | 1417.5                                       | 1417.5                                    |    |
| 6   | 1298.4                            | 1433.4                                       | 1433.4                                    |    |
| 7   | 1419.5                            | 1554.5                                       | 1554.5                                    |    |
| 8   | 1340.5                            | 1475.5                                       | 1475.5                                    |   |
| 9   | 1460.5                            | 1595.5                                       | 1595.5                                    |  |
| 10  | 1485.5                            | 1620.5                                       | 1620.5                                    |  |
| 11  | 1501.5                            | 1636.5                                       | 1636.5                                    |  |
| 12  | 1542.6                            | 1677.6                                       | 1677.5                                    |  |
| 13  | 1581.5                            | 1716.5                                       | 1716.5                                    |  |
| 14  | 1622.6                            | 1757.6                                       | 1757.5                                    |  |
| 15  | 1630.6                            | 1765.6                                       | 1765.6                                    |  |
| 16  | 1647.6                            | 1782.6                                       | 1782.6                                    |  |
| 17  | 1663.6                            | 1798.6                                       | 1798.6                                    |  |
| 18  | 1688.6                            | 1823.6                                       | 1823.6                                    |  |
| 19  | 1704.6                            | 1839.6                                       | 1839.6                                    |  |
| 20  | 1743.6                            | 1878.6                                       | 1878.5                                    |  |

|    |        |        |        |                                                                                       |
|----|--------|--------|--------|---------------------------------------------------------------------------------------|
| 21 | 1825.6 | 1960.6 | 1960.6 |    |
| 22 | 1850.7 | 1985.7 | 1985.7 |    |
| 23 | 1866.7 | 2001.7 | 2001.6 |    |
| 24 | 1905.6 | 2040.6 | 2040.6 |    |
| 25 | 1914.7 | 2049.7 | 2049.7 |    |
| 26 | 1939.8 | 2074.8 | 2074.8 |    |
| 27 | 1954.7 | 2089.7 | 2089.7 |    |
| 28 | 1995.7 | 2130.7 | 2130.7 |    |
| 29 | 1997.0 | 2132.0 | 2132.0 |    |
| 30 | 2012.7 | 2147.7 | 2147.7 |   |
| 31 | 2028.7 | 2163.7 | 2163.7 |  |
| 32 | 2067.6 | 2202.6 | 2202.6 |  |
| 33 | 2100.9 | 2235.9 | 2235.9 |  |
| 34 | 2110.7 | 2245.7 | 2245.7 |  |
| 35 | 2246.0 | 2381.0 | 2381.0 |  |
| 36 | 2304.8 | 2439.8 | 2439.8 |  |
| 37 | 2380.8 | 2515.8 | 2515.8 |  |
| 38 | 2395.2 | 2530.2 | 2530.2 |  |
| 39 | 2598.0 | 2733.0 | 2733.0 |  |
| 40 | 2679.0 | 2814.0 | 2814.0 |  |

---



**Table S5.** Observed m/z value in Figure 5 and corresponding fragmentation type of derivatized-NA2 (Y ions not included).

| Peak No. | Observed m/z value | Fragmentation type                |
|----------|--------------------|-----------------------------------|
| 1        | 204.1              | B2Y5                              |
| 2        | 366.2              | B2                                |
| 3        | 528.2              | B3                                |
| 4        | 893.4              | B5Y3                              |
| 5        | 1055.7             | B5Y4                              |
| 6        | 1276.7             | C5Y5                              |
| 7        | 1462.1             | Z <sup>1,5</sup> X <sub>Gal</sub> |
| 8        | 1666.1             | <sup>1,5</sup> X <sub>Gal</sub>   |
